# Supplementary material
Source: PubMed Central journal article supplement (PMC2805884)
Supplement: neo1201_0061SD1.pdf [file neo1201_0061SD1.pdf]

**A: Cell viability at 24 h under hypoxia**

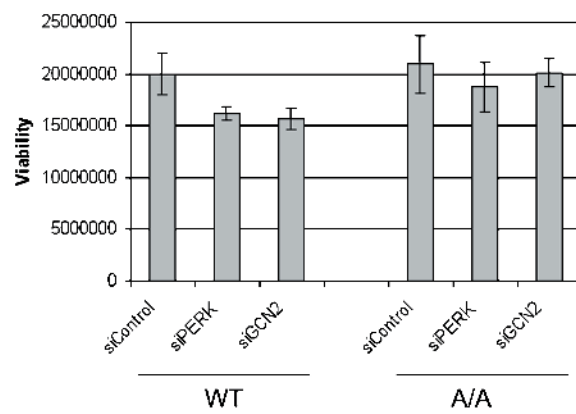

**B: Transfection efficiency**

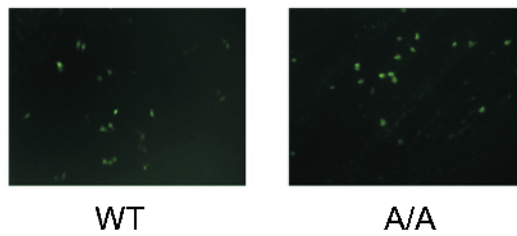

**Figure W1.** (A) siRNAs were transfected into MEF<sup>WT</sup> and MEF<sup>A/A</sup> cells to knock down PERK or GCN2. The transfected cells were exposed to hypoxia for 24 hours and viability was measured. (B) GFP vector was transfected into MEF<sup>WT</sup> and MEF<sup>A/A</sup> cells to show the transfection efficiency.
